# Supplementary material for: Amorphous electron donors with controllable morphology for non-fullerene polymer solar cells
Source: Royal Society of Chemistry journal article supplement (doi:10.1039/c9tc02663k), 2019-01-01
Supplement: c9tc02663k1.pdf [file c9tc02663k1.pdf]

*Electronic Supplementary information (ESI)*

**Amorphous Electron Donors with Controllable Morphology for Non-fullerene Polymer Solar cells**

Nergui Uranbileg,<sup>a,b</sup> Chenglin Gao,<sup>a,c</sup> Chunming Yang,<sup>d</sup> Xichang Bao,<sup>a</sup> Liangliang Han<sup>a,\*</sup>, and Renqiang Yang<sup>a,\*</sup>

<sup>a</sup>. CAS Key Laboratory of Bio-based Materials, Qingdao Institute of Bioenergy and Bioprocess Technology, Chinese Academy of Sciences, Qingdao 266101, China.

Email: hanll@qibebt.ac.cn, yangrq@qibebt.ac.cn

<sup>b</sup>. Center of Materials Science and Optoelectronics Engineering, University of Chinese Academy of Sciences, Beijing 100049, China.

<sup>c</sup>. College of Materials Science and Engineering, Qingdao University of Science and Technology, Qingdao 266042, China.

<sup>d</sup>. Shanghai Synchrotron Radiation Facility, Shanghai Advanced Research Institute, Chinese Academy of Sciences, Shanghai 201204, China.

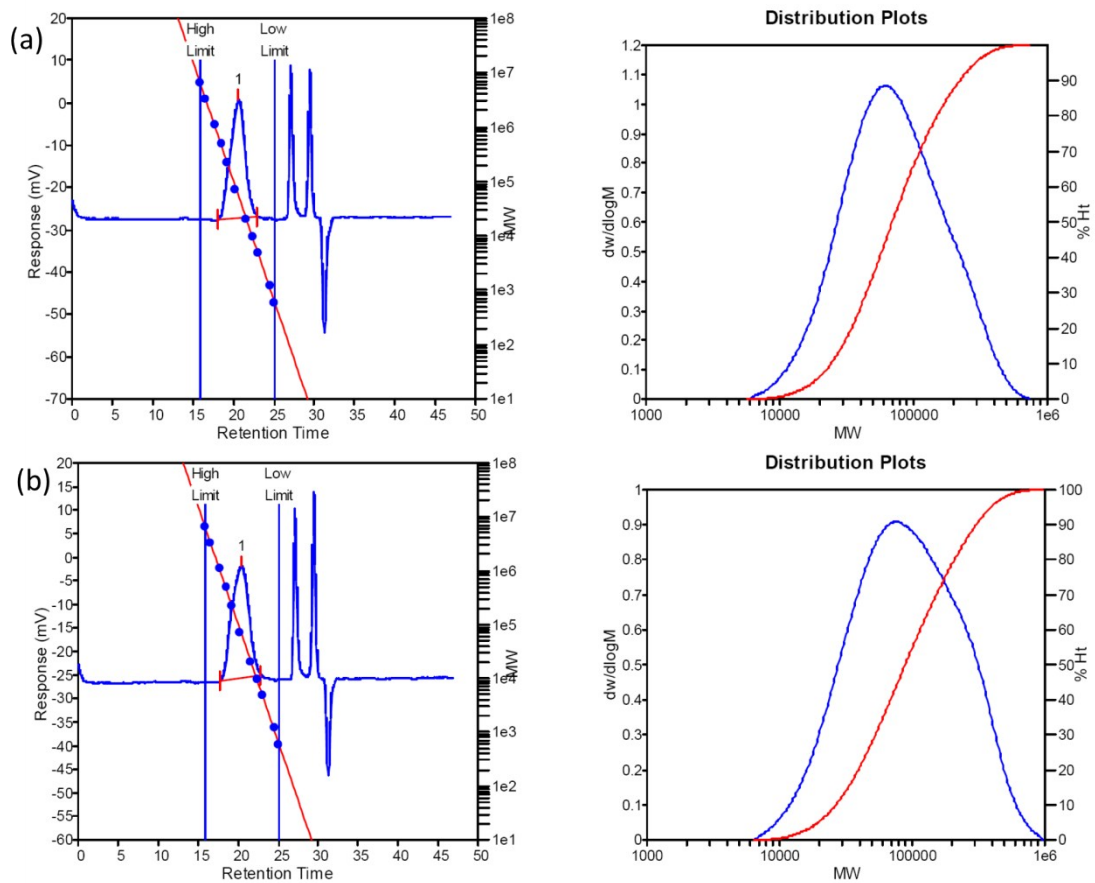

**Figure S1.** GPC chromatograms of PBDD-CH (a) and PBDD-CH-S (b) carried out in 1,2,4-trichlorobenzene at a column temperature of 150 °C.

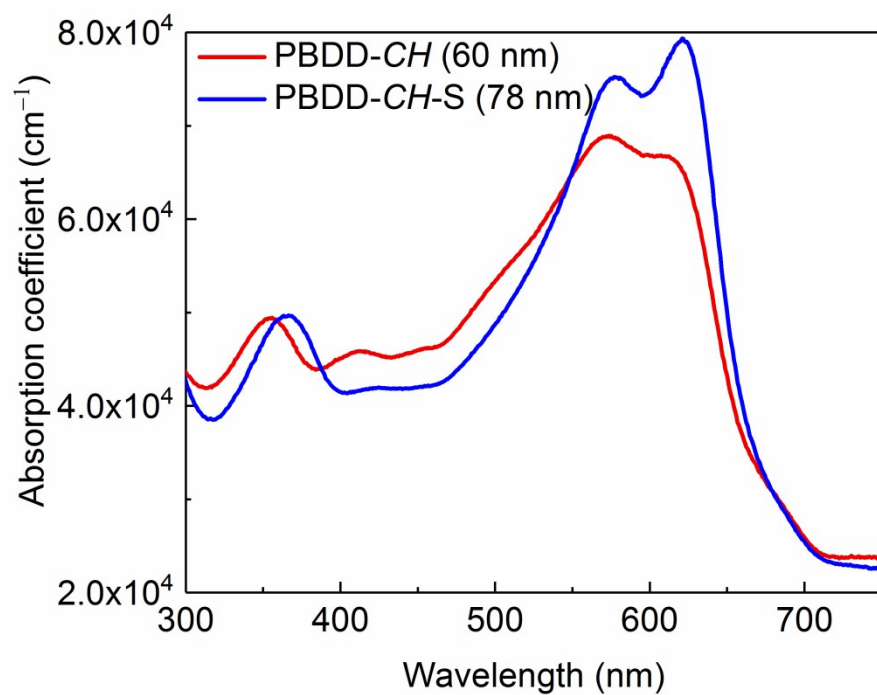

**Figure S2.** UV-vis absorption spectra for PBDD-CH and PBDD-CH-S in their pristine films.

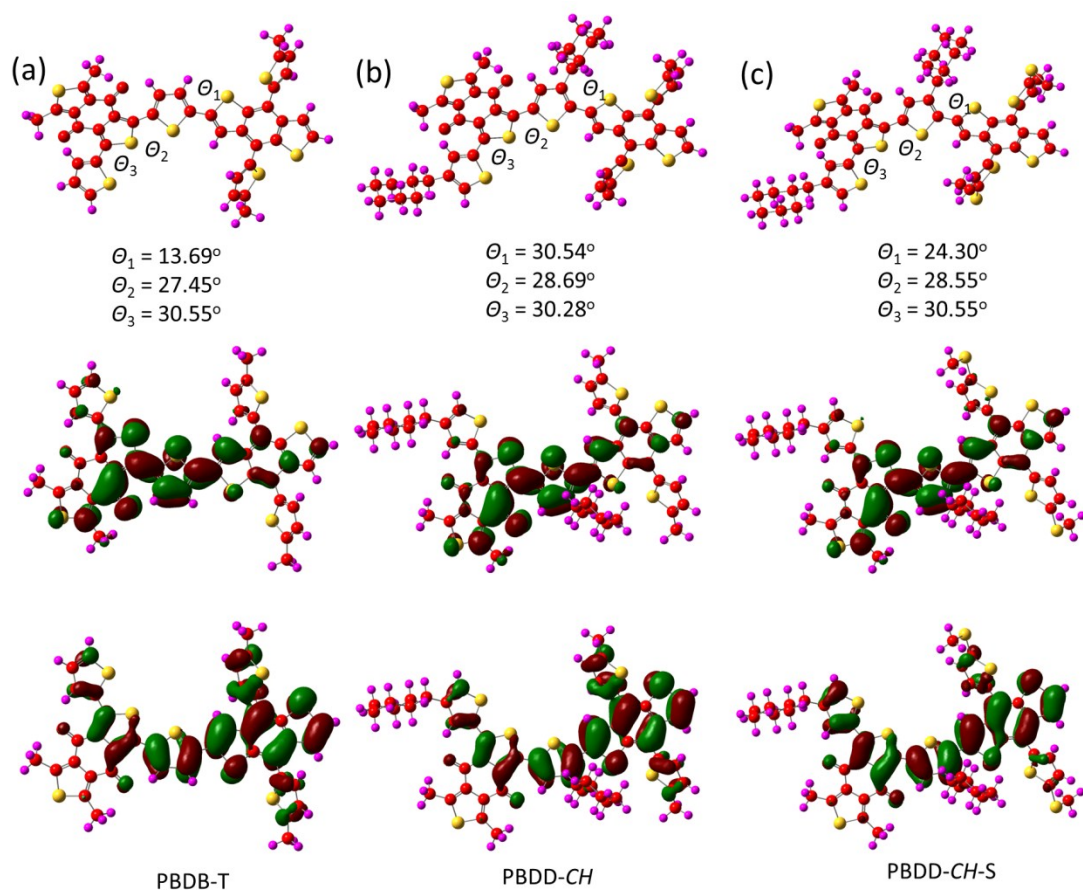

**Figure S3.** The ground-state geometries of BBDT-BDD repeated units (C: red, S: yellow, H: purple. To simplify the calculation, only one repeating unit of each polymer was subjected to the calculation, and 2-ethylhexyl was replaced by CH<sub>3</sub> groups).

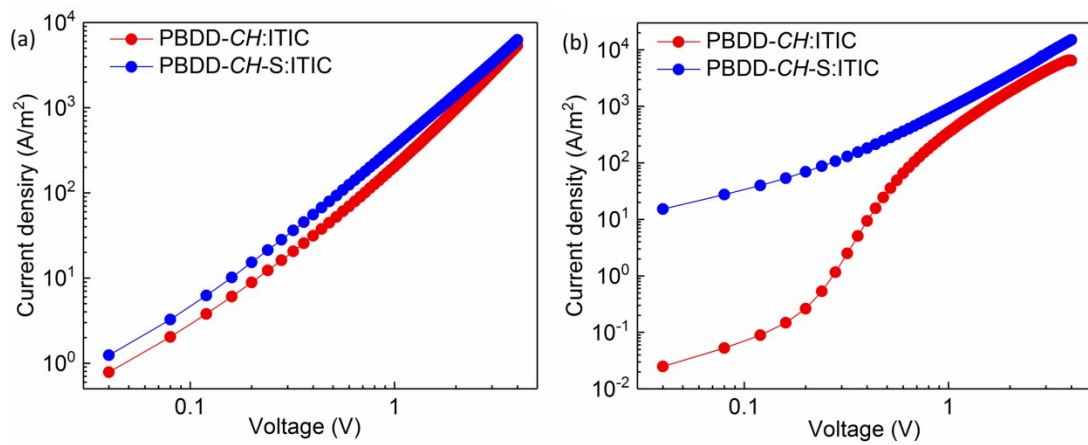

**Figure S4.**  $J$ -( $V_{\text{app}}-V_{\text{bi}}-V_{\text{s}}$ ) characteristics for PBDD-CH:ITIC and PBDD-CH-S:ITIC based devices.

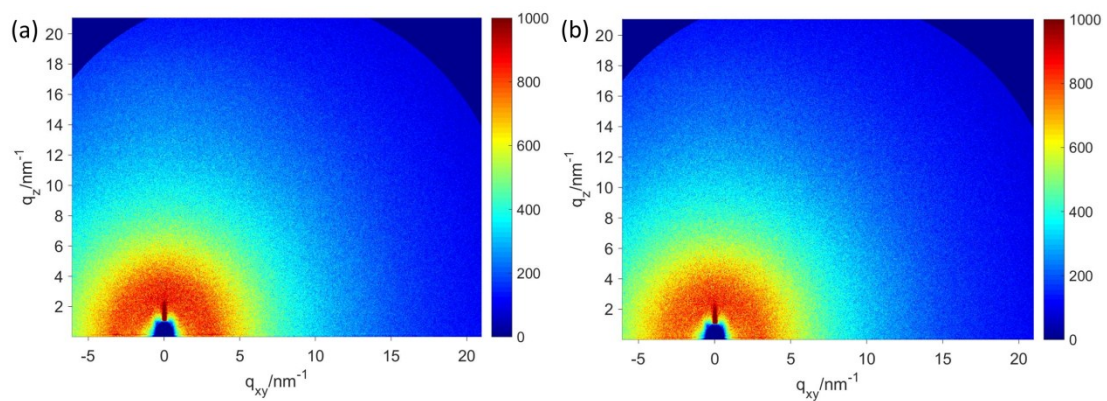

**Figure S5.** 2D-GIWAXS patterns for PBDD-CH:ITIC and PBDD-CH-S:ITIC blending films.

## Structure characterization of the monomers and polymers.

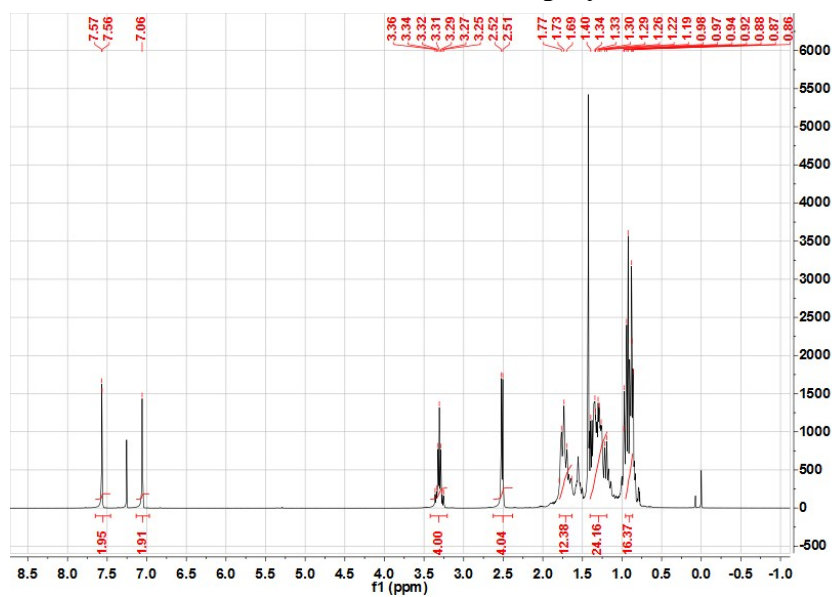

Figure S6.  $^1\text{H}$ NMR spectra for BDD-CH.

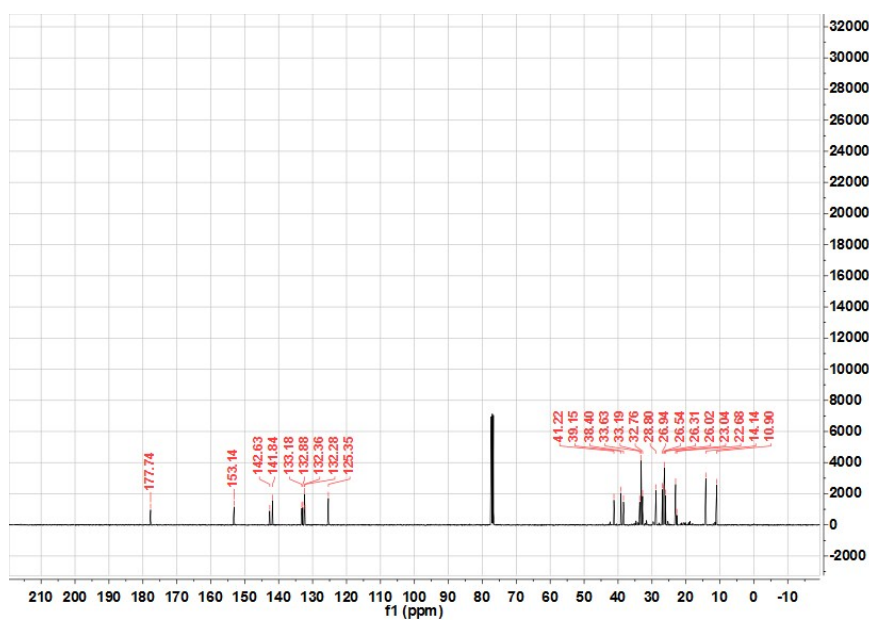

Figure S7.  $^{13}\text{C}$ NMR spectra for BDD-CH.

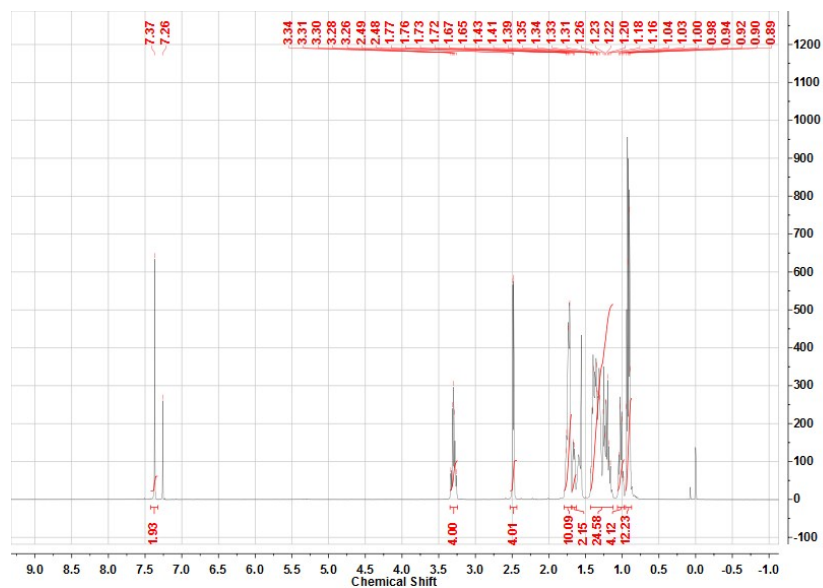

**Figure S8.**  $^1\text{H}$ NMR spectra for monomer DBrBDD-CH.

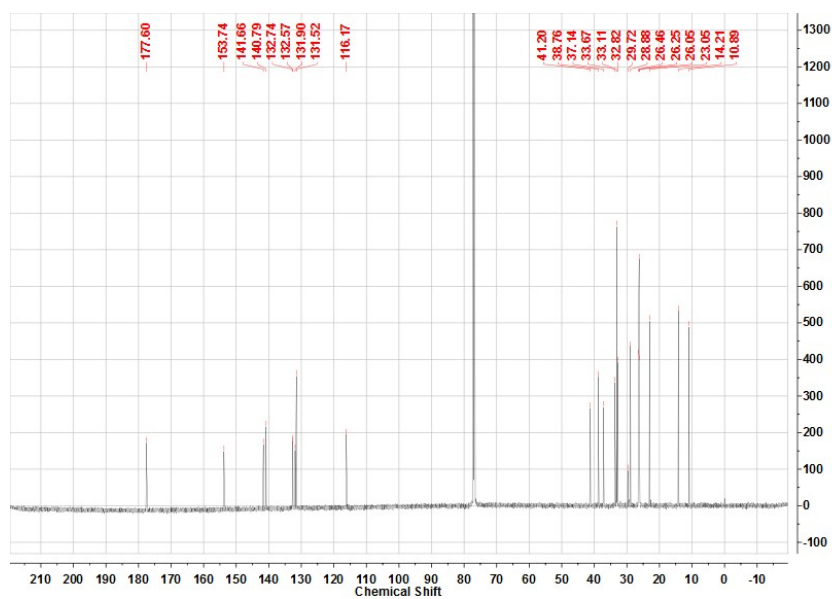

**Figure S9.**  $^{13}\text{C}$ NMR spectra for monomer DBrBDD-CH.



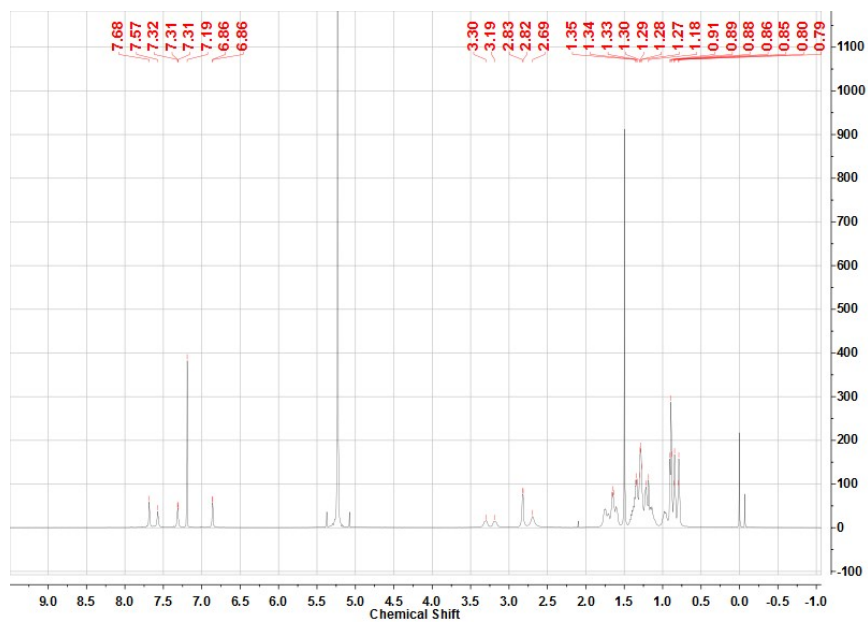

**Figure S10.**  $^1\text{H}$ NMR spectra for PBDD-CH.

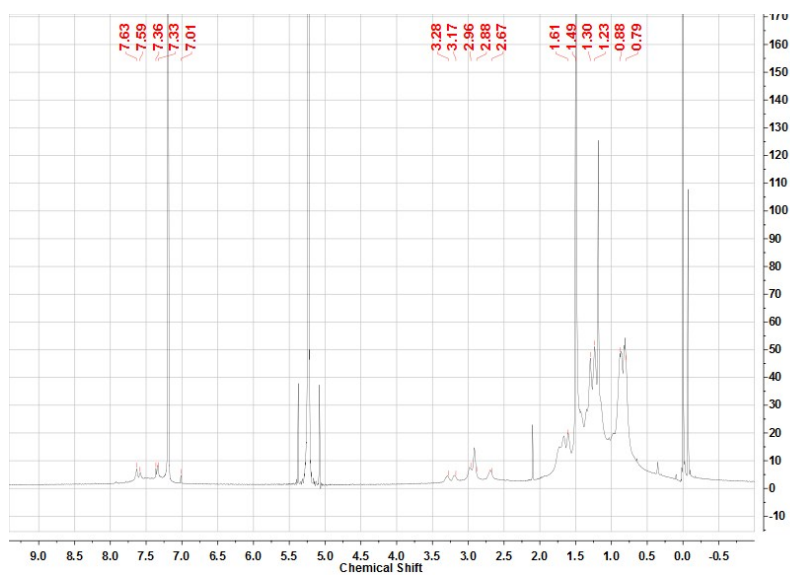

**Figure S11.**  $^1\text{H}$ NMR spectra for PBDD-CH-S.

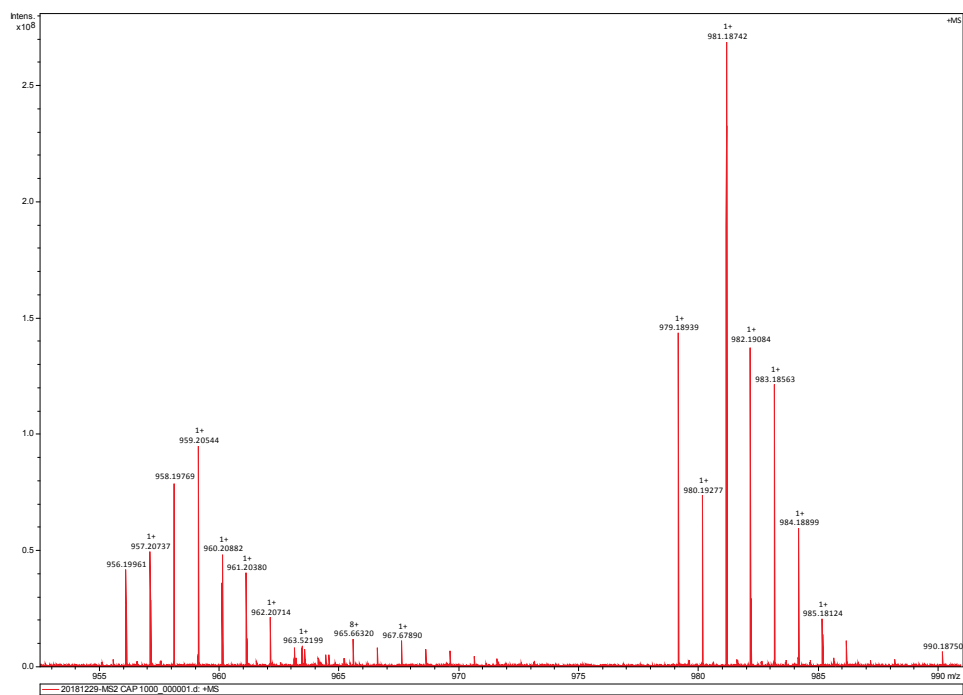

**Figure S12.** HRMS for monomer DBrBDD-CH.
